# Supplementary material for: NiX2(X = Cl and Br) sheets as promising spin materials: a first-principles study
Source: Royal Society of Chemistry journal article supplement (doi:10.1039/c7ra02218b), 2017-01-01
Supplement: c7ra02218b1.pdf [file c7ra02218b1.pdf]

## Supplementary information

“NiX<sub>2</sub> (X = Cl and Br) sheets as promising spin materials: A first-principles study” by Muhammad Mushtaq, Yungang Zhou and Xia Xiang

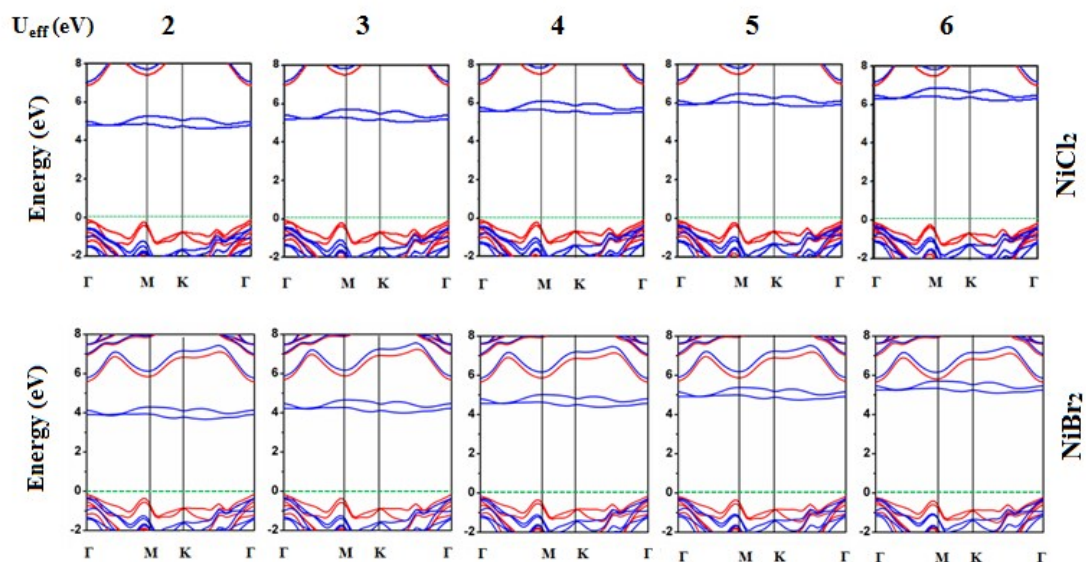

Figure 1S. Band structures of NiCl<sub>2</sub> and NiBr<sub>2</sub> sheets with different values of  $U_{eff}$ .

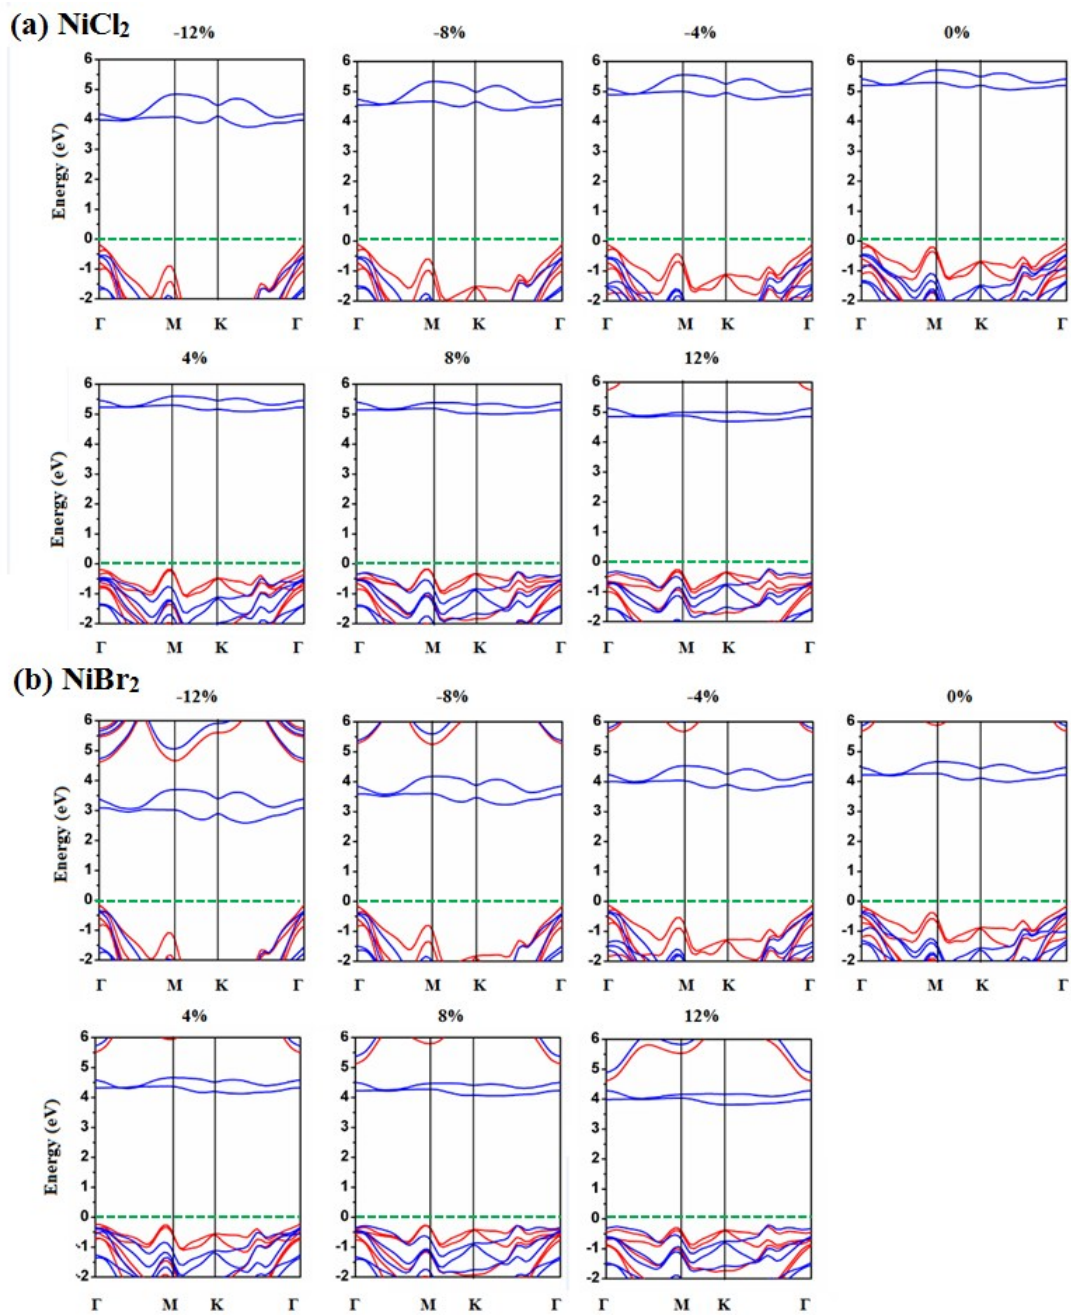

Figure 2S. Band structure of NiCl<sub>2</sub> and NiBr<sub>2</sub> sheets under different strains.
